# Supplementary material
Source: Springer Nature journal article supplement (https://www.springermedizin.de/resource/supplementary/12889_2010_2657_MOESM8_ESM.pdf/9486912)

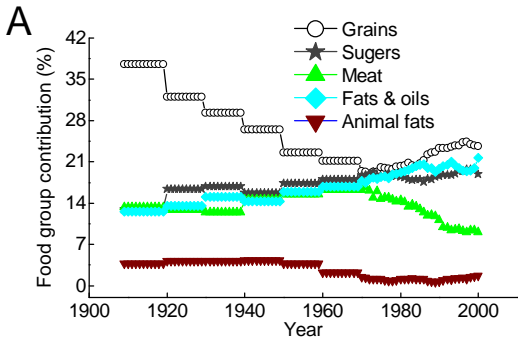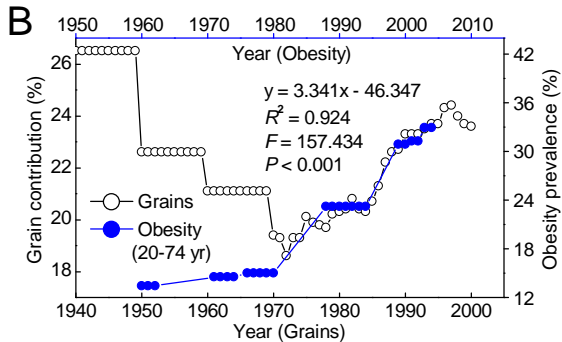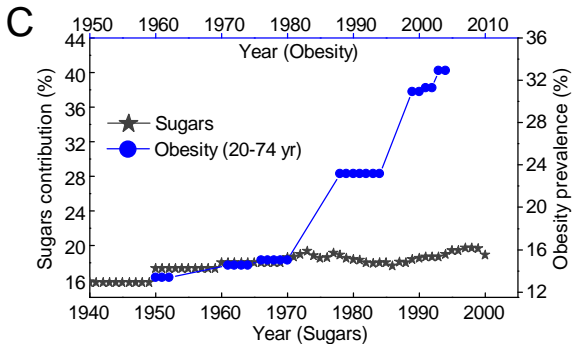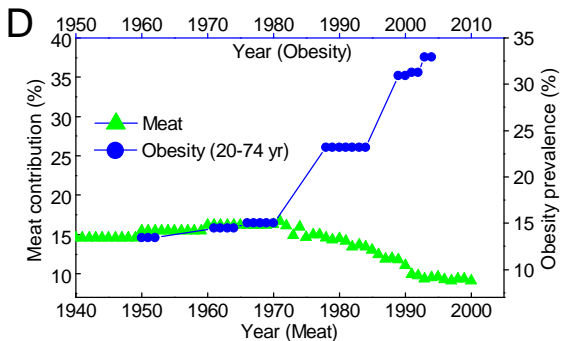

Supplement: MOESM8 [file 9486912]
